# Supplementary material for: Pathogen invasion-dependent tissue reservoirs and plasmid-encoded antibiotic degradation boost plasmid spread in the gut
Source: eLife. 2021 Dec 7;10:e69744. doi: 10.7554/eLife.69744 (PMC8651294; doi:10.7554/eLife.69744)
Supplement: Figure 1—figure supplement 1—source data 1. [file elife-69744-fig1-figsupp1-data1.xlsx]

## Sheet: panel A
			Log CFU/g feces. Individual mice are shown in columns
			day p.i.	Donors (SL1344 avir)													Recipients (14028)													Transconjugants (14028)
				1	2	3	4	5	6	7	8	9	10	11	12	13
			0
			1														2	2	2	2	2	2	2	2	2	2	2	2	2
			2														2	2	2	2	2	2	2	2	2	2	2	2	2
			3	8	9.2014	8.93952	9.25768	8.11059	9.35411	9.48287	2	9.21748	9.2878	9.84942	9.23195	9.45995	2	3.91856	2	6.26482	3.82478	7.19313	2	2	2	2	2	2	2	2	2	2	5.4456	3.17026	5.83632	2	2	2	2	2	2	2
			4	9.01703	9.46687	9.90795	9.38561	8.7007	9.29447	10.0128	9.20412	9.29667	9.22789	9.45025	9.38899	9.39643	2	5.27646	2	6.88138	2	7.84634	3.66276	2	2	2	8.36922	2	2	2	4.76641	2	6.26482	3.1271	7.7796	2	2	2	2	7.65514	2	2
			5	9.44091	8.94841	9.41162	9.55509	9.3927	9.01703	9.48144	10.4346	8.40654	9.15229	9.71349	8.83173	8.50991	6.51455	7.58995	2	8.82217	8.68842	7.96047	2.98677	4.34635	2	2	8.54407	2	2	5.80956	6.38917	2	8.40993	8.92737	7.3784	2	4.34635	2	2	7.76641	2	2
			6	9.89873	7.91803	8.0086	9.44716	9.09342	9.02119	8.71181	9.29003	8.47857	7.66464	9.0607	7.72354	7.02919	8.50651	6.01284	2	8.95424	7.75358	8.05308	7.73957	6	2	2	9.15836	3.02457	2	6.76567	4.53529	2	8.96942	8.73719	7.49969	6.53148	8.00432	2	2	8.91116	2	2
			7	9.18184	5.92993	5.49693	7.91645	6.99344	8.66464	8.35025	9.06819	5.84757	6.35025	8.84011	5.90658	6.41737	9.09691	5.88366	2	6	7.69285	8.51983	7.68842	6	2	2	9.02119	2	3.7184	8.68753	4.04922	2	8.19033	7.99344	8.92428	7.46687	8.30103	2	2	8.95521	2	2
			8	8.86923	5.76268	5.8109	8.29447	7.55145	8.5611	8.10721	8.36361	5.31175	6.08279	8.3032	5.3608	5.93112	8.26245	5.1038	2	6.5092	8.60206	6.95376	7.13988	7.73078	2	2	9.01284	2	4.31399	8.57171	3.2878	2	8.4609	8.25285	7.25527	7.67486	8.20951	2	2	8.49831	2	2
			9	7.88649	6.00432	4.38202	8.18752	7.57634	7.97267	8.6902	2	4.79028	3.55871	8.0607	5.32389	5.33619	7.62014	5.50786	2	5	8.60314	5	7.5092	9.27416	2	2	8.38202	2	4.12231	8.70757	4.39093	2	7.76567	7.85065	7.0899	7.89982	8.13672	2	2	8.81823	2	2
			10	8.91645	5.45788	3.06819	6.67025	6.67025	8.27875	8.57634	7.45332	4.98091	5.44405	7.7356	5.43409	5.2761	8.97955	4.06819	2	7.44871	8.78746	6.36922	7.4014	8.77597	3.0899	3.09342	8.83251	2	4.98289	8.53782	4.61278	2	8.233	7.62428	8.45939	7.6561	8.12385	2	2	9.02531	2	2

## Sheet: panel B
			Log CFU/g feces. Individual mice are shown in columns
			day p.i.	Donors (SL1344 avir)								Recipients (14028 SPI-2 neg)								Transconjugants (14028 SPI-2 neg)
				1	2	3	4	5	6	7	8	1	2	3	4	5	6	7	8	1	2	3	4	5	6	7	8
			0
			1									2	2	2	2	2	2	2	2
			2									2	2	2	2	2	2	2	2
			3	8.21918	9.08074	9.09401	9.22705	9.19085	9.40306	9.20141	8.96782	2	2	2	2	2	2	2	5.43933	2	2	2	2	2	2	2	4.66679
			4	9.19284	9.26962	9.12494	9.30567	9.27799	9.34754	9.32123	9.30558	2	2	2	2	2	2	2	4.91064	2	2	2	2	2	2	2	4.84619
			5	9.20206	9.05622	9.16273	8.86453	9.20834	9.30965	9.22099	9.06096	2	2	2	2	2	2	2	7.81337	2	2	2	2	2	2	2	7.81337
			6	8.95258	8.44445	8.68298	7.00109	8.22967	8.40841	8.10117	8.16823	2	2	2	2	2	2	2	6.81771	2	2	2	2	2	2	2	6.67753
			7	8.2427	7.69897	7.40833	4.60879	7.62761	6.39147	6.56247	7.09353	2	2	2	2	2	2	2	6.26672	2	2	2	2	2	2	2	5.22386
			8	7.0674	4.79048	6.06122	4.78693	7.35639	4.26553	5.66129	6.88993	2	2	2	2	2	2	2	6.40437	2	2	2	2	2	2	2	5.17393
			9	4.94076	3.50169	5.30718	4.07572	6.48039	2.76955	4.14688	6.14468	2	2	2	2	2	2	2	6.51431	2	2	2	2	2	2	2	5.15423
			10	3.05061	4.31893	4.65535	3.45697	5.99123	3.61753	4.60206	4.79345	2	2.60293	2	2	2	2	2	5.61401	2	2	2	2	2	2	2	4.34851

## Sheet: panel C
			Log CFU/g feces. Individual mice are shown in columns
		day p.i.	Donors (E coli 536)												Recipients (14028)												Transconjugants (14028)
			1	2	3	4	5	6	7	8	9	10	11	12	1	2	3	4	5	6	7	8	9	10	11	12	1	2	3	4	5	6	7	8	9	10	11	12
		0
		1													2	2	2	2	2	2	2	2	2	2	2	2	2	2	2	2	2	2	2	2	2	2	2	2
		2													2	2	2	2	2	2	2	2	2	2	2	2	2	2	2	2	2	2	2	2	2	2	2	2
		3	9.66727	9.40493	9.43511	9.8406	9.79259	10.0082	9.76439	9.8663	9.76654	9.94584	9.45608	9.71566	2	2	2	2	2	2	2	2	2	4.57103	2	2	2	2	2	2	2	2	2	2	2	2	2	2
		4	9.50515	9.51284	9.59118	9.84835	9.64095	9.45518	9.49138	10.0484	9.9814	9.6807	9.80867	9.69163	2	2	2	2	8.37557	2	2	2	7.7683	7.29612	2	8.50745	2	2	2	2	5.72147	2	2	2	5.8735	7.45885	2	4.94027
		5	9.15815	9.33882	8.83335	9.17223	9.38377	8.14418	9.48015	9.90008	9.88628	8.97104	9.16065	9.01797	4.322	2	2	2	7.48945	2	2	2	8.10237	7.50864	3.58087	8.52605	2	2	2	2	8.73	2	2	2	8.2485	7.90658	2	7.2132
		6	8.06334	7.89721	8.44274	7.6713	9.84787	8.40478	8.21586	8.94656	9.14018	9.50131	7.4318	9.02127	4.95064	2	4.23862	4.50649	8.67908	2	2	9.46943	8.07572	7.84764	6.5576	9.11304	2	2	2	2	9.39923	2	2	4.55376	7.67778	4.86928	5.64664	9.04609
		7	7.29177	6.07425	8.55867	6.40952	9.59134	6.37073	7.96268	8.48858	9.8451	9.82179	6.79588	8.95289	5.52834	2	5.95974	6.82344	9.11421	2	3.16749	8.59973	8.81954	8.22816	6.19208	9.49696	2	2	3.81673	2	9.15561	2	2	8.57077	8.69897	8.52919	3.79588	9.12898
		8	8.24988	4.53334	7.72949	5.15638	9.05799	6.03533	9.15773	8.70966	7.78915	9.76839	6.78013	8.0549	5.24988	2	6.52774	6.19589	9.24205	2	2	8.53356	7.96524	6	5.36713	7.75387	2	2	2.88439	2	8.30332	2	2	9.23253	7.48812	8.27107	4.6138	7.85078
		9	5.84013	4.99266	8.67707	6.06215	8.8401	3.56864	8.5127	8.33995	8.56331	9.6721	6.52547	9.13717	5.05498	2	7.09463	7.44236	9.08464	3.14267	4.26116	8.85024	6	6	5.82805	6.75696	2	2	4.39076	2	8.22731	2.66555	2	8.94201	8.08619	8.989	4.6581	7.90309
		10	6.62694	4.62939	7.63579	6.36401	9.47712	4.91624	8.80147	9.33827	9.15515	9.16702	6.42839	9.10588	5.52756	2	6.63522	7.85538	8.26077	2.85933	4.55596	8.50897	8.77773	6	6.31347	6	2	2	3.75498	2	8.26077	2	2	8.45097	9.06173	8.39469	4.62796	7.51481
