# Supplementary material for: Pathogen invasion-dependent tissue reservoirs and plasmid-encoded antibiotic degradation boost plasmid spread in the gut
Source: eLife. 2021 Dec 7;10:e69744. doi: 10.7554/eLife.69744 (PMC8651294; doi:10.7554/eLife.69744)
Supplement: Figure 1—figure supplement 3—source data 1. [file elife-69744-fig1-figsupp3-data1.xlsx]

## Sheet: panel A
				Log CFU / g feces, recipients. Individual mice numbered and indicated in columns
		day p.i.	invG mutant recipient
			1	2	3	4	5
		2	2	2	2	2	2
		3	2	2	2	2	2
		4	2	2	2	2	2
		5	2	2	2	2	2
		6	2	2	9.14277	2	2
		7	2	5.5006	8.33521	2	2
		8	2	8.44004	7.99327	2	2
		9	4.61003	8.41904	8.97256	2	3.23508
		10	6.7637	7.9881	8.52951	2	2

## Sheet: panel B
	Log CFU / g feces, or log CFU / organ. Individual mice numbered and indicated in columns
organ	invG mutant recipient
	1	2	3	4	5
Feces	6.7637	7.9881	8.52951	2	2
Spleen	5.39093	4.50515	5.19313	5.04139	2.716
Liver	5.38021	4.49638	5.38021	5.11207	4.85346
GB	2.59106	2.20412	3.13672	2.27875	1.30103
mLN	3.15229	3.8451	4.23045	2.68124	3.24304
