# Supplementary material for: Pathogen invasion-dependent tissue reservoirs and plasmid-encoded antibiotic degradation boost plasmid spread in the gut
Source: eLife. 2021 Dec 7;10:e69744. doi: 10.7554/eLife.69744 (PMC8651294; doi:10.7554/eLife.69744)
Supplement: Figure 1—figure supplement 4—source data 1. [file elife-69744-fig1-figsupp4-data1.xlsx]

## Sheet: panel A
			Log CFU / g feces, 14028 population (all KanR CFUs). Individual mice numbered and indicated in columns
		day p.i.	With donors				Without donors						p value (two-tailed Mann-Whitney test)
			1	2	3	4	1	2	3	4	5
		2	2	2	2	2	2	2	2	2	2		>0.9999	ns
		3	2	2	2	2	2	2	2	2	2		>0.9999	ns
		4	3.75815	2	2	2	2	9.49136	2	2	2		>0.9999	ns
		5	6.32838	2	2	2	8.90849	10.1238	2	2	8.88986		0.246	ns
		6	7.26717	2	2	2	9.60423	9.65418	3.6637	2	9.20412		0.1349	ns
		7	8.00432	2	2	2	9.51983	9.63144	2	2	8.90902		0.246	ns
		8	7.81158	2	2	2	9.35218	9.6721	3.54531	2	9.48996		0.1349	ns
		9	7.93349	3.52504	2	2	9.55388	8.84634	2	2	9.19313		0.3492	ns
		10	7.71517	3.43136	2.76716	2	8.60423	9.03342	2	2	8.99782		0.5635	ns

## Sheet: panel B
		Log CFU / g feces, or log CFU / organ. Individual mice numbered and indicated in columns
	organ	With donors				Without donors						p value (two-tailed Mann-Whitney test)
		1	2	3	4	1	2	3	4	5
	Feces	7.71517	3.43136	2.76716	2	8.60423	9.03342	2	2	8.99782		0.5635	ns
	Spleen	5.79519	5.13988	4.91381	5.49693	5.48287	5.13988	4.25527	4.91381	5.78958		0.5238	ns
	Liver	5.42814	4.64345	4.716	5.15836	4.96379	4.64345	3.60206	2.30103	5.5611		0.4444	ns
	GB	4.27875	3.64738	3.07918	3.96755	4.2014	4.86213	1.60206	1.30103	4.61384		0.9048	ns
	mLN	4.93802	3.31806	2.14613	4.12711	4.81158	4.52634	1.30103	1.30103	4.47857		0.8333	ns

## Sheet: panel C
			Log CFU/g feces. Individual mice are shown in columns
			Mice with donors
		day p.i.	Donors (SL1344 avir)				Recipients (14028)				Transconjugants (14028)
			1	2	3	4	1	2	3	4	1	2	3	4
		0
		1					2	2	2	2
		2					2	2	2	2
		3	9.32838	9.87448	9.56229	9.48572	2	2	2	2	2	2	2	2
		4	9.05308	9.43616	9.78176	9.49136	3.75815	2	2	2	2	2	2	2
		5	9.60959	9.71933	8.88874	9.49554	6.22011	2	2	2	5.67486	2	2	2
		6	8.71517	9.01703	8.03743	9.07555	7.21748	2	2	2	6.29885	2	2	2
		7	8.34439	7.1959	6.14613	8.68124	7.47712	2	2	2	7.85309	2	2	2
		8	7.93551	7.07555	4.51188	8.34044	7.3927	2	2	2	7.60314	2	2	2
		9	7.20412	5.3032	4.45332	8.55509	6	3.52504	2	2	7.943	2	2	2
		10	5	5.30103	5.26007	8.51587	6	3.43136	2.76716	2	7.92065	2	2	2
