# Supplementary material for: Pathogen invasion-dependent tissue reservoirs and plasmid-encoded antibiotic degradation boost plasmid spread in the gut
Source: eLife. 2021 Dec 7;10:e69744. doi: 10.7554/eLife.69744 (PMC8651294; doi:10.7554/eLife.69744)
Supplement: Figure 1—figure supplement 5—source data 1. [file elife-69744-fig1-figsupp5-data1.xlsx]

## Sheet: panel A
				Log CFU/g feces. Individual mice are shown in columns
			day p.i.	Donors (E coli 536)							Recipients (14028)							Transconjugants (14028)
				1	2	3	4	5	6	7	1	2	3	4	5	6	7	1	2	3	4	5	6	7
			0
			1								2	2	2	2	2	2	2	2	2	2	2	2	2	2
			2								2	2	2	2	2	2	2	2	2	2	2	2	2	2
			3								2	2	2	2	2	2	2	2	2	2	2	2	2	2
			4								2	2	2	2	2	2	2	2	2	2	2	2	2	2
			5								2	2	2	2	2	2	2	2	2	2	2	2	2	2
			6	2	2	2	2	2	2	2	2	2	2	2	2	2	2	2	2	2	2	2	2	2
			7	2	2	2.68825	2	2	2	2	2	2	2	2	2	2	2	2	2	2	2	2	2	2
			8	2	2	2	2	2	2	2	2	2	2	7.07955	2	2	2	2	2	2	5.68946	2	2	2
			9	9.34615	5.10375	5.32721	9.2582	7.17263	2	8.36677	2	2	2	6.74232	2	2	2	2	2	2	8.70136	2	2	2
			10	9.38827	9.09691	8.87416	9.34933	3.49894	2	9.45493	2	2	2	7.16749	2	2	2	2	2	2	8.92337	2	2	2
			11	9.69174	9.30611	8.83502	9.81988	7.62346	2	9.73598	2	2	3.3165	9.37648	2	2	2	2	2	2	8.86833	2	2	2
			12	9.36269	8.44883	8.54975	9.51491	5.6341	2	8.80867	2	2	7.6209	8.33427	2	2	2	2	2	5.3279	7.95861	2	2	2
			13	9.42468	7.56964	8.27352	8.9461	4.33819	2	9.84873	2	2	6	8.90718	2	2	2	2	2	8.32095	7.40203	2	2	2
			14	9.37336	7.90892	8.68022	9.2949	6.21201	2	9.49212	2	4.1588	7.67162	9.03392	2	2	2	2	2	8.91217	7.59346	2	2	2
			15	9.40616	8.08442	6.68508	9.26731	6.36015	3.72617	9.38831	2	6.20936	4	8.55804	3.68674	2	2	2	2	5.38405	8.2015	3.4437	2	2

## Sheet: panel B
				Log CFU/g feces, or CFU / organ. Individual mice are shown in columns
				Donors (E coli 536)							Recipients (14028)							Transconjugants (14028)
				1	2	3	4	5	6	7	1	2	3	4	5	6	7	1	2	3	4	5	6	7
			Feces	9.40616	8.08442	6.68508	9.26731	6.36015	3.72617	9.38831	2	6.20936	4	8.55804	3.68674	2	2	2	2	5.38405	8.2015	3.4437	2	2
			Spleen	1.30103	1.30103	1.30103	1.30103	1.30103	1.30103	1.30103	4.15836	4.09621	4.41896	4.0835	3.50515	3.95231	4.26102	1.30103	1.30103	1.30103	1.60206	1.30103	1.30103	1.30103
			Liver	1.90309	1.90309	1.90309	1.90309	1.90309	1.90309	1.90309	4.2833	4.35025	4.29754	3.98945	3.61909	4.0103	4.52218	1.90309	1.90309	1.90309	2.20412	1.90309	1.90309	1.90309
			GB	1	1	1	1	1	1	1	1	1	1	1	1	1	1.30103	1	1	1	1	1	1	1
			mLN	2.14613	1	1	1	1	1	1.30103	2.69897	2.83251	3.5563	3.76343	1	1	2.90309	1	1	2.38021	2.44716	1	1	1
