# Supplementary material for: Pathogen invasion-dependent tissue reservoirs and plasmid-encoded antibiotic degradation boost plasmid spread in the gut
Source: eLife. 2021 Dec 7;10:e69744. doi: 10.7554/eLife.69744 (PMC8651294; doi:10.7554/eLife.69744)
Supplement: Figure 1—figure supplement 6—source data 1. [file elife-69744-fig1-figsupp6-data1.xlsx]

## Sheet: Sheet1
		Log CFU / g feces or intestinal content, cm of tissue, organ, or ml blood. Mice organized into rows
			organ
	mouse#		Feces	Duodenum Content	Jejunum Content	Ileum Content	Cecal Content	Colon Content	Blood	Liver	Spleen	Kidney	Heart	Lung	Brain	Gall Bladder	SB GALT	LB GALT	mLN	Duodenum Tissue	Jejunum Tissue	Ileum Tissue	Cecal Tissue	Colon Tissue
	1		2	2.69897	4.25527	3.17609	2.69897	2	3.11394	4.50515	3.66652	4.26482	2.30103	2.30103	1.30103	2.51851	3.98227	3.88536	1.90309	2	1	2.20412	1	1.30103
	2		2	2	2	3.60206	2	2	2	3.68124	3.2833	4.20412	1.30103	1.30103	1.30103	1.69897	3.60206	2.07918	1	1.69897	2.30103	2.60206	1	1
	3		2	2	2	2.69897	2.69897	2	2	3.72263	3.19312	3.92428	1.30103	1.30103	1.30103	1.30103	3.80618	3.59329	2.74819	1.30103	1	1	1	1.47712
	4		2	2	2	2	2	2	2	3.96755	3.35025	1.30103	1.30103	1.30103	1.30103	1.30103	3.12057	2.07918	1.8451	1	1	1	1	1
	5		2	2	2	2	2	2	2.60206	4.23754	3.7839	3.47712	1.30103	1.77815	1.30103	1.90309	3.68124	1.69897	1.47712	2.11394	1	1	1	1
	6		2	2	3.30103	2	2	2	3.47712	4.15836	3.74819	3.90309	1.30103	1.30103	1.30103	1	3.25527	1.47712	1	1.30103	1.77815	1.47712	1	2.04139
	7		2	2	3.47712	3.74036	2	2	2	3.36549	3.04922	2.62325	1.30103	1.60206	1.30103	1.30103	3.50515	2.41497	2.50515	1	1.47712	1	1	1
