# Supplementary material for: Pathogen invasion-dependent tissue reservoirs and plasmid-encoded antibiotic degradation boost plasmid spread in the gut
Source: eLife. 2021 Dec 7;10:e69744. doi: 10.7554/eLife.69744 (PMC8651294; doi:10.7554/eLife.69744)
Supplement: Figure 1—source data 1. [file elife-69744-fig1-data1.xlsx]

## Sheet: panel B
				Log CFU / g feces, transconjugants. Individual mice numbered and indicated in columns
		day p.i.	WT recipient													SPI-2 negative recipient									p value (two-tailed Mann-Whitney test)
			1	2	3	4	5	6	7	8	9	10	11	12	13	1	2	3	4	5	6	7	8
		2	2	2	2	2	2	2	2	2	2	2	2	2	2	2	2	2	2	2	2	2	2		>0.9999	ns
		3	2	2.6637	2	5.4456	3.17026	5.83632	2	2	2	2	2	2	2	2	2	2	2	2	2	2	4.66679		0.4726	ns
		4	2	4.76641	2	6.26482	3.1271	7.7796	2	2	2	2	7.65514	2	2	2	2	2	2	2	2	2	4.84619		0.241	ns
		5	5.80956	6.38917	2	8.40993	8.92737	7.3784	2.38381	4.34635	2	2	7.76641	2	2	2	2	2	2	2	2	2	7.81337		0.0615	ns
		6	6.76567	4.53529	2	8.96942	8.73719	7.49969	6.53148	8.00432	2	2	8.91116	2	2	2	2	2	2	2	2	2	6.67753		0.0286	*
		7	8.68753	4.04922	2	8.19033	7.99344	8.92428	7.46687	8.30103	2	2	8.95521	2	2	2	2	2	2	2	2	2	5.22386		0.0221	*
		8	8.57171	3.2878	2	8.4609	8.25285	7.25527	7.67486	8.20951	2	2	8.49831	2	2	2	2	2	2	2	2	2	5.17393		0.0221	*
		9	8.70757	4.39093	2	7.76567	7.85065	7.0899	7.89982	8.13672	2	2	8.81823	2	2	2	2	2	2	2	2	2	5.15423		0.0221	*
		10	8.53782	4.61278	2	8.233	7.62428	8.45939	7.6561	8.12385	2	2	9.02531	2	2	2	2	2	2	2	2	2	4.34851		0.016	*

## Sheet: panel C
			Log CFU / g feces, or log CFU / organ. Individual mice numbered and indicated in columns
		organ	WT recipient													WT transconjugants													SPI-2 negative recipients								SPI-2 negative transconjugants
			1	2	3	4	5	6	7	8	9	10	11	12	13	1	2	3	4	5	6	7	8	9	10	11	12	13	1	2	3	4	5	6	7	8	1	2	3	4	5	6	7	8
		Feces	8.97955	4.06819	2	7.44871	8.78746	6.36922	7.4014	8.77597	3.0899	3.09342	8.83251	2	4.98289	8.53782	4.61278	2	8.233	7.62428	8.45939	7.6561	8.12385	2	2	9.02531	2	2	2	2.60293	2	2	2	2	2	5.61401	2	2	2	2	2	2	2	4.34851
		Spleen	4.44405	4.38382	4.12711	4.25768	4.42651	4.19033	4.83251	4.88081	4.69897	4.9345	5.23553	4.44716	5.72263	1.30103	1.30103	1.30103	1.30103	1.60206	1.30103	1.30103	1.30103	1.30103	1.30103	1.30103	1.30103	1.30103	3.22531	2.30103	2.96379	2.25527	2.25527	2.80618	2.34242	2.50515	1.30103	1.30103	1.30103	1.30103	1.30103	1.30103	1.30103	1.30103
		Liver	5.2833	4.85552	4.10721	5.15836	5.22531	4.92065	4.94448	5.13354	4.12711	4.44405	4.60206	4.72263	5.45939	1.90309	1.90309	1.90309	1.90309	2.20412	1.90309	1.90309	2.50515	1.90309	1.90309	1.90309	1.90309	1.90309	3.04922	2.38021	2.85733	1.90309	1.90309	1.90309	1.90309	1.90309	1.90309	1.90309	1.90309	1.90309	1.90309	1.90309	1.90309	1.90309
		GB	5.24797	1.95424	2.69897	3.44091	5.52634	3.48572	3.06446	6.62325	2.79239	1.60206	6.5682	2.25527	3.56585	1	1	1	1	1	1	1	1	1	1	1	1	1	1	1.30103	1	1	1	1.47712	1	1	1	1	1	1	1	1	1	1
		mLN	4.58995	4.07918	1	4.29003	3.13672	4.13033	4.25527	3.01703	2.76343	1.8451	4.989	3.13354	3.95999	3.48572	2.54407	1	2.66276	1	2.8451	3.38739	3.51587	1	1	2.68124	1	1	1.30103	2.60206	1	1	1	1	1	2.4624	1	1	1	1	1	1	1	1.30103
			p value (two-tailed Mann-Whitney test)
			** WT vs SPI-2 negative is compared for each of recipients and transconjugants
			Recipients		Transconjugants
		Feces	0.0035	**	0.016	*
		Spleen	<0.0001	****	>0.9999	ns
		Liver	<0.0001	****	<0.0001	****
		GB	<0.0001	****	>0.9999	ns
		mLN	0.0004	***	0.0358	*

## Sheet: panel D
				Log CFU / g feces, transconjugants. Individual mice numbered and indicated in columns
		day p.i.	WT recipient; E coli 536 donor
			1	2	3	4	5	6	7	8	9	10	11	12
		2	2	2	2	2	2	2	2	2	2	2	2	2
		3	2	2	2	2	2	2	2	2	2	2	2	2
		4	2	2	2	2	5.72147	2	2	2	5.8735	7.45885	2	4.94027
		5	2	2	2	2	8.73	2	2	2	8.2485	7.90658	2	7.2132
		6	2	2	2	2	9.39923	2	2	4.55376	7.67778	4.86928	5.64664	9.04609
		7	2	2	3.81673	2	9.15561	2	2	8.57077	8.69897	8.52919	3.79588	9.12898
		8	2	2	2.88439	2	8.30332	2	2	9.23253	7.48812	8.27107	4.6138	7.85078
		9	2	2	4.39076	2	8.22731	2.66555	2	8.94201	8.08619	8.989	4.6581	7.90309
		10	2	2	3.75498	2	8.26077	2	2	8.45097	9.06173	8.39469	4.62796	7.51481

## Sheet: panel E
			Log CFU / g feces, or log CFU / organ. Individual mice numbered and indicated in columns
		organ	WT recipient												WT transconjugants
			1	2	3	4	5	6	7	8	9	10	11	12	1	2	3	4	5	6	7	8	9	10	11	12
		Feces	5.52756	2	6.63522	7.85538	8.26077	2.85933	4.55596	8.50897	8.77773	6	6.31347	6	2	2	3.75498	2	8.26077	2	2	8.45097	9.06173	8.39469	4.62796	7.51481
		Spleen	5.03342	4.25527	5.20412	4.79239	5.28326	3.60206	5.19312	6.38596	5.10721	4.79197	5.65128	5.4216	1.30103	1.30103	1.30103	1.30103	1.30103	1.30103	1.30103	1.30103	1.30103	1.77815	1.30103	1.30103
		Liver	5.04922	4.20412	4.60206	4.94448	5.34978	3.20412	5.20412	6.25334	5.20369	4.82685	5.39724	5.46894	1.90309	1.90309	1.90309	1.90309	2.38021	1.90309	1.90309	1.90309	2.20412	1.90309	1.90309	1.90309
		GB	2.73239	1	5.20074	6.49136	5.39445	1	3.17026	6.95999	3.47129	3.03342	6.69548	4.40824	1	1	3.09342	1	1	1	1	1	1	1	1	1
		mLN	3.26482	1	3.69897	3.61909	3.93952	1.95424	3.48287	5.89376	3.69548	3.63949	4.1089	3.71517	1	1	1	1	2.62325	1	1	3	3.66652	3.36549	2.04139	2.61278
