# Supplementary material for: Pathogen invasion-dependent tissue reservoirs and plasmid-encoded antibiotic degradation boost plasmid spread in the gut
Source: eLife. 2021 Dec 7;10:e69744. doi: 10.7554/eLife.69744 (PMC8651294; doi:10.7554/eLife.69744)
Supplement: Figure 2—figure supplement 1—source data 1. [file elife-69744-fig2-figsupp1-data1.xlsx]

## Sheet: panels A and B
	Relative proportion of tags (relative to all tags). Both inocula are shown. 10 mice are indicated for 5 organs. Each organ is labeled for the first mouse and then the following 10 mice belong to that organ group. Chromosomal tags are plotted in panel A, plasmid tags in panel B#
			chromosomal tags					plasmid tags
			tag 1		tag 2		tag 3		tag 4		tag 5		tag 6		tag 7
		Recipient inoc.	0.444854		0.274737		0.280228		1.53533e-05		4.36881e-05		9.11083e-05		3.19476e-05
		Recipient inoc.	0.326188		0.343322		0.308277		3.80177e-07		2.46378e-07		1.21574e-07		2.19196e-07
		Donor inoc.	1.66785e-06		6.02234e-07		7.85283e-07		0.242677		0.267969		0.247099		0.242251
		Donor inoc.	7.03069e-06		5.87119e-07		6.57005e-07		0.406381		0.307711		0.285899		0.408544
		1 -feces	1.43091e-05		0.384588		5.4911e-06		3.28192e-06		0.257624		1.30486e-06		0.357764
		2	6.73027e-06		6.83958e-06		0.462497		0.00791902		2.70615e-06		5.66392e-07		0.529567
		3	0.327179		0.000301049		5.56371e-06		0.260211		0.116925		0.0677015		0.227676
		4	1.21159e-06		0.612524		0.000822676		0.290113		0.0866248		0.00704941		0.00286503
		5	0.000668493		0.328408		5.75692e-06		0.194827		0.039851		0.125916		0.310324
		6	1.5254e-05		8.70028e-05		0.518058		0.0440897		0.0728656		0.168052		0.196832
		7	0.000398945		0.311507		0.0589533		4.36111e-05		0.000191958		0.628179		0.00072619
		8	3.17265e-06		0.999987		4.36508e-06		8.91754e-07		2.73758e-06		1.35191e-06		4.11061e-07
		9	3.70359e-05		2.79011e-05		0.999902		4.52706e-06		1.3602e-05		9.89952e-06		5.18542e-06
		10	0.377867		8.28564e-05		3.14583e-05		0.0286021		0.58711		0.00532408		0.000982054
		1 -Spleen	0.38354		0.325812		0.290467		7.38868e-06		0.000171333		1.68145e-06		7.9823e-07
		2	0.481667		0.459844		0.0584749		1.84908e-06		6.83756e-06		1.33359e-06		4.79758e-06
		3	0.211415		0.363745		0.424559		1.38518e-06		0.000278307		8.23145e-07		7.29379e-07
		4	0.492255		0.158419		0.346997		0.000952233		6.24293e-06		0.00136262		7.49443e-06
		5	0.346791		0.270335		0.382854		3.7463e-06		1.06978e-05		5.17895e-06		1.04867e-06
		6	0.403868		0.278999		0.317087		6.27102e-06		1.69505e-05		1.12217e-05		1.11416e-05
		7	0.474426		0.194089		0.331371		3.88933e-06		1.30398e-05		9.42155e-05		3.62582e-06
		8	0.356346		0.320435		0.323212		1.01851e-06		2.26931e-06		3.20125e-06		6.28012e-07
		9	0.335988		0.247775		0.416215		4.00317e-06		1.02945e-05		4.78294e-06		2.96166e-06
		10	0.268641		0.315974		0.415185		8.00674e-06		0.000171164		1.23777e-05		8.72065e-06
		1 -Liver	0.377793		0.328536		0.293662		3.01292e-06		3.93276e-06		1.57748e-06		1.63152e-07
		2	0.516407		0.41546		0.0681193		1.68382e-06		7.89421e-06		4.12782e-07		3.1818e-06
		3	0.227003		0.3271		0.445888		1.62841e-06		4.84122e-06		3.41426e-07		2.94392e-06
		4	0.443684		0.185084		0.369322		0.00167485		1.525e-06		0.000232247		1.45261e-06
		5	0.368579		0.256127		0.375238		1.31928e-05		1.90465e-05		1.10085e-05		1.33034e-05
		6	0.361466		0.292957		0.345519		9.20851e-06		1.75552e-05		1.96773e-05		1.09459e-05
		7	0.350782		0.172872		0.476065		7.66799e-06		1.78435e-05		0.000253683		2.12968e-06
		8	0.35871		0.319818		0.321456		1.28301e-06		5.00874e-06		9.61178e-06		6.3711e-07
		9	0.346912		0.197608		0.455443		6.64937e-06		2.11948e-05		5.68223e-06		3.63353e-06
		10	0.296114		0.329907		0.373802		2.3899e-05		8.7624e-05		2.76414e-05		3.74086e-05
		1 -GB	0.0121523		0.968211		0.0196312		2.62953e-06		1.23303e-06		2.08579e-06		5.94195e-08
		2	0.166398		0.493826		0.33976		1.55408e-06		6.07539e-06		8.02907e-07		7.44932e-06
		3	0.453365		0.316587		0.230044		1.36062e-06		1.08162e-06		6.88002e-07		1.26771e-06
		4	0.001515		0.997366		0.00111186		2.22124e-06		1.81024e-06		2.49897e-06		1.05017e-06
		5	0.24418		0.205836		0.549936		4.10654e-06		1.45728e-05		1.32016e-05		1.56162e-05
		6	0.291731		0.286234		0.421954		8.66605e-06		1.72124e-05		2.82227e-05		2.67848e-05
		7	0.000283216		0.00028827		0.999399		4.64224e-06		1.82212e-05		2.96321e-06		3.54897e-06
		8	0.0898339		0.865707		0.0444583		7.03197e-08		3.24563e-07		1.16023e-07		1.17256e-07
		9	0.269317		0.46098		0.269659		3.57606e-06		2.18705e-05		1.36106e-05		4.63503e-06
		10	0.998191		0.000795097		0.000954489		9.82446e-06		2.56433e-05		7.48988e-06		1.65427e-05
		1 -mLN	0.0384352		0.505433		0.056384		1.64382e-06		0.109687		8.08098e-07		0.290059
		2	0.108953		0.00664942		0.819997		3.82121e-06		0.0108016		0.0120058		0.0415895
		3	0.684932		0.151752		0.135182		0.0176833		0.0047968		0.00147849		0.00417585
		4	0.380054		0.371977		0.247958		2.12757e-06		1.85978e-06		4.97144e-06		2.10078e-06
		5	0.103282		0.826083		0.0487786		0.0144315		5.21159e-06		0.00452727		0.0028917
		6	0.0591689		0.0710886		0.741376		0.0449127		0.0256186		0.0543242		0.00351105
		7	0.0398254		0.466677		0.0569437		4.59859e-06		1.05773e-05		0.436533		6.0246e-06
		8	0.47504		0.215443		0.309513		8.53052e-07		1.44042e-06		1.8731e-06		1.92334e-07
		9	0.647636		0.352326		1.96488e-05		2.67144e-06		1.12717e-05		3.54841e-06		1.39382e-06
		10	0.726589		0.0997068		0.0958224		0.000630425		0.0697052		0.00753605		9.75554e-06
