# Supplementary material for: Pathogen invasion-dependent tissue reservoirs and plasmid-encoded antibiotic degradation boost plasmid spread in the gut
Source: eLife. 2021 Dec 7;10:e69744. doi: 10.7554/eLife.69744 (PMC8651294; doi:10.7554/eLife.69744)
Supplement: Figure 2—figure supplement 2—source data 1. [file elife-69744-fig2-figsupp2-data1.xlsx]

## Sheet: panel A
	Mice without donors
	Relative proportion of tags (relative to all tags). 5 mice are indicated for 5 organs. Each organ is labeled for the first mouse and then the following 4 mice belong to that organ group.
	n/a = tag not detected; 10^-8 is the lowest relative proportion plotted on the graph, but proportions are calculated for lower values, although these are all far below the detection limit
			chromosomal tags
			tag 1		tag 2		tag 3		tag 4		tag 5		tag 6		tag 7
		Recipient inoc.	0.167141		0.151662		0.342202		0.0725797		0.104499		0.018477		0.143439
		1 -feces	7.33638e-05		4.12283e-08		0.997692		6.10703e-05		0.00198728		0.000183138		2.88134e-06
		2	3.43333e-11		7.05323e-12		0.999962		1.14887e-11		2.44555e-12		3.80943e-05		1.53165e-11
		3	n/a		n/a		n/a		n/a		n/a		n/a		n/a
		4	n/a		n/a		n/a		n/a		n/a		n/a		n/a
		5	1.62071e-09		1.81419e-10		0.00362039		0.00471472		0.99164		2.53073e-07		2.50354e-05
		1 -Spleen	0.419368		0.30607		0.120777		0.0212514		0.019117		0.112194		0.00122215
		2	0.144093		1.48045e-05		0.849141		0.006733		1e-08		1.80038e-05		1e-08
		3	0.124177		0.00020335		0.0131998		0.0852445		0.43695		0.340068		0.000158172
		4	1		3.83551e-10		1.00674e-09		4.26318e-11		3.14002e-09		5.28886e-10		2.8564e-12
		5	0.0446142		8.15647e-05		6.19431e-06		2.40528e-06		3.40206e-06		0.00466933		0.950623
		1 -Liver	0.566039		0.00984956		0.0119544		0.00321415		0.108528		3.10933e-09		0.300415
		2	0.4525		0.0198468		0.2047		0.253427		0.0388476		0.00223986		0.0284396
		3	0.0820701		0.00784159		0.00848915		0.0817778		0.817376		0.00182731		0.000617715
		4	1		3.32756e-11		3.41693e-11		2.11689e-11		7.74743e-11		6.73422e-11		1.58588e-10
		5	0.355343		0.068049		0.370682		0.011854		0.187546		0.0020875		0.00443898
		1 -GB	0.359992		0.137738		0.152943		0.0490911		0.229009		0.0415949		0.0296331
		2	0.000280539		5.89426e-06		0.999284		5.66011e-06		0.000186849		1.37758e-06		0.000235648
		3	n/a		n/a		n/a		n/a		n/a		n/a		n/a
		4	n/a		n/a		n/a		n/a		n/a		n/a		n/a
		5	0.475317		0.013875		0.42382		0.0202945		0.066626		6.76516e-05		0.0561821
		1 -mLN	0.0205771		0.0121698		0.890664		0.0183816		0.0370731		0.0211213		1.31227e-05
		2	9.34084e-05		0.000652705		0.997075		3.07689e-05		0.00084287		0.00108308		0.0002225
		3	n/a		n/a		n/a		n/a		n/a		n/a		n/a
		4	n/a		n/a		n/a		n/a		n/a		n/a		n/a
		5	0.123425		0.0759637		0.741509		0.02402		0.0342443		0.000644638		0.000193395

## Sheet: panel B
	Mice with donors
	Relative proportion of tags (relative to all tags). 4 mice are indicated for 5 organs. Each organ is labeled for the first mouse and then the following 3 mice belong to that organ group.
	10^-8 is the lowest relative proportion plotted on the graph, but proportions are calculated for lower values, although these are all far below the detection limit
			chromosomal tags
			tag 1		tag 2		tag 3		tag 4		tag 5		tag 6		tag 7
		Recipient inoc.	0.167141		0.151662		0.342202		0.0725797		0.104499		0.018477		0.143439
		6 -feces	0.996742		0.000797983		8.92768e-10		1.24258e-08		0.00246007		6.26517e-12		9.05649e-13
		7	3.43202e-10		0.388842		0.611158		9.14344e-13		2.67491e-10		2.37385e-11		8.02351e-13
		8	7.56199e-10		1.04245e-09		2.10742e-09		8.82817e-11		9.27689e-09		1		1.0068e-11
		9	4.78016e-11		1.95008e-10		1		1.38149e-11		3.21341e-10		1.26453e-11		2.28993e-13
		6 -Spleen	0.441445		0.531527		0.000538058		0.00502705		1.25858e-05		4.52737e-05		0.0214044
		7	0.280536		0.186525		0.0308724		0.377581		0.0549368		0.00357924		0.0659692
		8	0.188122		0.315639		0.293151		0.0479638		0.0254829		0.0919492		0.0376922
		9	0.985784		8.91145e-06		0.0063004		4.01601e-07		0.00392205		0.00398393		1e-08
		6 -Liver	0.0631953		0.132134		0.00541925		0.00517614		0.322339		0.000132661		0.471605
		7	0.419676		0.00234996		0.0286495		0.00413841		0.182803		7.45173e-10		0.362383
		8	0.45022		0.0483806		0.194886		0.0186968		0.117932		1.24652e-05		0.169871
		9	0.235263		0.0468644		0.047893		0.00607805		0.208186		0.0210127		0.434703
		6 -GB	0.139158		0.542357		0.0781361		0.0100175		0.121924		0.000105004		0.108302
		7	0.109809		0.0250665		0.00992418		0.0132536		0.00890971		5.00076e-06		0.833032
		8	0.420779		0.0592117		0.00956724		0.0571833		0.031783		2.78431e-05		0.421448
		9	0.619863		0.0142765		0.154656		0.0126948		0.080504		8.30006e-05		0.117923
		6 - mLN	0.257624		0.263912		0.123593		0.22577		0.0123475		0.046383		0.0703705
		7	0.0723349		6.96217e-13		0.870133		0.0273577		0.0289171		9.06708e-05		0.00116706
		8	0.903601		2.00139e-11		0.0634169		0.00124225		0.0317396		3.46442e-12		2.20897e-10
		9	0.0756775		0.105861		0.026087		0.00309228		0.00287911		0.00131911		0.785084
