# Supplementary material for: Pathogen invasion-dependent tissue reservoirs and plasmid-encoded antibiotic degradation boost plasmid spread in the gut
Source: eLife. 2021 Dec 7;10:e69744. doi: 10.7554/eLife.69744 (PMC8651294; doi:10.7554/eLife.69744)
Supplement: Figure 2—figure supplement 4—source data 1. [file elife-69744-fig2-figsupp4-data1.xlsx]

## Sheet: panel A
		Log CFU / g feces
					The first 13 mice are with SL1344 avir as a donor, the second 12 mice are with E coli 536 as a donor. Mice are numbered in rows
		Donor population feces	Transconjugant population feces
	1	8.91645	8.53782
	2	5.45788	4.61278
	3	3.06819	2
	4	6.67025	8.233
	5	6.67025	7.62428
	6	8.27875	8.45939
	7	8.57634	7.6561
	8	7.45332	8.12385
	9	4.98091	2
	10	5.44405	2
	11	7.7356	9.02531
	12	5.43409	2
	13	5.2761	2
	1	6.62694	2
	2	4.62939	2
	3	7.63579	3.75498
	4	6.36401	2
	5	9.47712	8.26077
	6	4.91624	2
	7	8.80147	2
	8	9.33827	8.45097
	9	9.15515	9.06173
	10	9.16702	8.39469
	11	6.42839	4.62796
	12	9.10588	7.51481

## Sheet: panel B
		Log CFU / g feces
					The first 13 mice are with SL1344 avir as a donor, the second 12 mice are with E coli 536 as a donor. Mice are numbered in rows
		Donor population feces	Transconjugant population mLN
	1	8.91645	3.48572
	2	5.45788	2.54407
	3	3.06819	1
	4	6.67025	2.66276
	5	6.67025	1
	6	8.27875	2.8451
	7	8.57634	3.38739
	8	7.45332	3.51587
	9	4.98091	1
	10	5.44405	1
	11	7.7356	2.68124
	12	5.43409	1
	13	5.2761	1
	1	6.62694	1
	2	4.62939	1
	3	7.63579	1
	4	6.36401	1
	5	9.47712	2.62325
	6	4.91624	1
	7	8.80147	1
	8	9.33827	3
	9	9.15515	3.66652
	10	9.16702	3.36549
	11	6.42839	2.04139
	12	9.10588	2.61278
