# Supplementary material for: Pathogen invasion-dependent tissue reservoirs and plasmid-encoded antibiotic degradation boost plasmid spread in the gut
Source: eLife. 2021 Dec 7;10:e69744. doi: 10.7554/eLife.69744 (PMC8651294; doi:10.7554/eLife.69744)
Supplement: Figure 2—source data 1. [file elife-69744-fig2-data1.xlsx]

## Sheet: panel A
		chromosomal tag proportion (relative to all tags), ranked by most abundant in the feces
		individual mice shown in columns and numbered
	organ	Most										2nd										3rd
		1	2	3	4	5	6	7	8	9	10	1	2	3	4	5	6	7	8	9	10	1	2	3	4	5	6	7	8	9	10
	Feces	0.462497	0.327179	0.612524	0.328408	0.518058	0.311507	0.999987	0.999902	0.377867	0.384588	6.84e-06	0.000301	0.000823	0.000668	8.7e-05	0.058953	4.37e-06	3.7e-05	8.29e-05	1.43e-05	6.73e-06	5.56e-06	1.21e-06	5.76e-06	1.53e-05	0.000399	3.17e-06	2.79e-05	3.15e-05	5.49e-06
	Spleen	0.058475	0.211415	0.158419	0.270335	0.317087	0.194089	0.320435	0.416215	0.268641	0.325812	0.459844	0.363745	0.346997	0.346791	0.278999	0.331371	0.323212	0.335988	0.315974	0.38354	0.481667	0.424559	0.492255	0.382854	0.403868	0.474426	0.356346	0.247775	0.415185	0.290467
	Liver	0.068119	0.227003	0.185084	0.256127	0.345519	0.172872	0.319818	0.455443	0.296114	0.328536	0.41546	0.3271	0.369322	0.368579	0.292957	0.476065	0.321456	0.346912	0.329907	0.377793	0.516407	0.445888	0.443684	0.375238	0.361466	0.350782	0.35871	0.197608	0.373802	0.293662
	GB	0.33976	0.453365	0.997366	0.205836	0.421954	0.000288	0.865707	0.269659	0.998191	0.968211	0.493826	0.316587	0.001112	0.24418	0.286234	0.999399	0.044458	0.269317	0.000795	0.012152	0.166398	0.230044	0.001515	0.549936	0.291731	0.000283	0.089834	0.46098	0.000954	0.019631
	mLN	0.819997	0.684932	0.371977	0.826083	0.741376	0.466677	0.215443	1.96e-05	0.726589	0.505433	0.006649	0.151752	0.247958	0.103282	0.071089	0.056944	0.309513	0.647636	0.099707	0.038435	0.108953	0.135182	0.380054	0.048779	0.059169	0.039825	0.47504	0.352326	0.095822	0.056384

## Sheet: panel B
		plasmid tag proportion (relative to all tags), ranked by most abundant in the feces
		individual mice shown in columns and numbered
	organ	Most										2nd										3rd										4th
		1	2	3	4	5	6	7	8	9	10	1	2	3	4	5	6	7	8	9	10	1	2	3	4	5	6	7	8	9	10	1	2	3	4	5	6	7	8	9	10
	Feces	0.357764	0.529567	0.260211	0.290113	0.310324	0.196832	0.628179	2.74e-06	1.36e-05	0.58711	0.257624	0.007919	0.227676	0.086625	0.194827	0.168052	0.000726	1.35e-06	9.9e-06	0.028602	3.28e-06	2.71e-06	0.116925	0.007049	0.125916	0.072866	0.000192	8.92e-07	5.19e-06	0.005324	1.3e-06	5.66e-07	0.067702	0.002865	0.039851	0.04409	4.36e-05	4.11e-07	4.53e-06	0.000982
	Spleen	7.98e-07	4.8e-06	1.39e-06	0.000952	1.05e-06	1.11e-05	9.42e-05	2.27e-06	1.0295e-05	0.00017116	0.000171	1.85e-06	7.29e-07	6.24e-06	3.75e-06	1.12e-05	3.63e-06	3.2e-06	4.78e-06	8.01e-06	7.39e-06	6.84e-06	0.000278	0.001363	5.18e-06	1.7e-05	1.3e-05	1.02e-06	2.96e-06	1.24e-05	1.68e-06	1.33e-06	8.23e-07	7.49e-06	1.07e-05	6.27e-06	3.89e-06	6.28e-07	4e-06	8.72e-06
	Liver	1.63e-07	3.18e-06	1.63e-06	0.001675	1.33e-05	1.09e-05	0.000254	5.01e-06	2.12e-05	8.76e-05	3.93e-06	1.68e-06	2.94e-06	1.53e-06	1.32e-05	1.97e-05	2.13e-06	9.61e-06	5.68e-06	2.39e-05	3.01e-06	7.89e-06	4.84e-06	0.000232	1.1e-05	1.76e-05	1.78e-05	1.28e-06	3.63e-06	2.76e-05	1.58e-06	4.13e-07	3.41e-07	1.45e-06	1.9e-05	9.21e-06	7.67e-06	6.37e-07	6.65e-06	3.74e-05
	GB	5.94e-08	7.45e-06	1.36e-06	2.22e-06	1.56e-05	2.68e-05	2.96e-06	3.25e-07	2.19e-05	2.56e-05	1.23e-06	1.55e-06	1.27e-06	1.81e-06	4.11e-06	2.82e-05	3.55e-06	1.16e-07	1.36e-05	9.82e-06	2.63e-06	6.08e-06	1.08e-06	2.5e-06	1.32e-05	1.72e-05	1.82e-05	7.03e-08	4.64e-06	7.49e-06	2.09e-06	8.03e-07	6.88e-07	1.05e-06	1.46e-05	8.67e-06	4.64e-06	1.17e-07	3.58e-06	1.65e-05
	mLN	0.290059	0.041589	0.017683	2.13e-06	0.002892	0.003511	0.436533	1.44e-06	1.13e-05	0.069705	0.109687	3.82e-06	0.004176	1.86e-06	0.014432	0.054324	6.02e-06	1.87e-06	3.55e-06	0.00063	1.64e-06	0.010802	0.004797	4.97e-06	0.004527	0.025619	1.06e-05	8.53e-07	1.39e-06	0.007536	8.08e-07	0.012006	0.001478	2.1e-06	5.21e-06	0.044913	4.6e-06	1.92e-07	2.67e-06	9.76e-06
