# Supplementary material for: Pathogen invasion-dependent tissue reservoirs and plasmid-encoded antibiotic degradation boost plasmid spread in the gut
Source: eLife. 2021 Dec 7;10:e69744. doi: 10.7554/eLife.69744 (PMC8651294; doi:10.7554/eLife.69744)
Supplement: Figure 3—figure supplement 1—source data 1. [file elife-69744-fig3-figsupp1-data1.xlsx]

## Sheet: panel A
			Log CFU/g feces. Individual mice are shown in columns
		day p.i.	1st Donors (E coli 536 P2cat)					Recipients (14028)					P2cat Transconjugants (14028)					2nd Recipient (SB300 p2cured)					2nd Transconjugants (SB300)
			1	2	3	4	5	1	2	3	4	5	1	2	3	4	5	1	2	3	4	5	1	2	3	4	5
		0
		1						2	2	2	2	2
		2						2	2	2	2	2
		3	9.96473	9.85126	10.0294	9.96284	9.63367	2	2	2	7.24055	2	2	2	2	4.65418	2
		4	9.76418	10.1931	9.89818	9.76193	9.75061	2	2	7.33041	6.72099	8.19336	2	2	4.45179	8.35025	5.53105
		5	7.0899	8.69373	9.43136	9.62428	9.32813	2	2	7.12057	6	6.93367	2	2	8.58995	8.56585	7.83676
		6	7.68215	8.1959	8.35411	9.98091	8.19028	2	2	6.60531	6	6	2	2	7.75205	8.13033	6.86806
		7	5.58771	6.19313	8.88874	10.4014	9.17271	2	2	7.00432	6.75205	7.80322	2	2	8.49415	8.78533	8.85602
		8	6.50786	5.38917	9.12711	10.1875	9.36151	2	2	7.78462	6.84136	7.83863	2	2	8.73078	8.58206	8.59196
		9	5.80277	5.01703	8.48001	9.80003	8.80043	2	2	7.42651	6	8.37766	2	2	8.44091	7.47567	6.84619
		10	6.65225	5.04532	8.68395	10.2304	8.46273	2	2	7.20683	6	8.48121	2	2	7.63246	8.52375	7.40203
		11	2	2	2	2	2	2	2	2.79309	2	2.98297	2	2	2	3.54778	2
		12	2	2	2	2	2	2	2	2	2	2	2	2	2	2	2
		13	2	2	2	2	2	2	2	2	2	2	2	2	2	2	2
		14	2	2	2	2	2	2	2	2	2	2	2	2	2	2	2
		15	2	2	2	2	2	2	2	2	2	2	2	2	2	2	2
		16	2	2	2	2	2	2	2	2	2	2	2	2	2	2	2	9.29667	4.46538	2	2	7.89963	2	2	2	2	2
		17	2	2	2	2	2	2	2	2	2	3.81911	2	2	2	2	2.86487	9.29667	7.23045	4.5092	7.22011	8.94402	2	2	2	2	4.78915
		18	2	2	2	2	2	2	2	2	2	2	2	2	2	2	5.13842	9.03743	8.80956	8.74429	8.45332	7.23533	2	2	2	2	8.49857
		19	2	2	2	2	2	2	2	2	2	2	2	2	2	2	5.59346	8.88252	8.81491	8.72346	8.74663	6	2	2	7.95665	2	9.09861
		20	2	2	2	2	2	2	2	2	2	4.57168	2	2	2	2	2.73283	8.86451	8.84011	7.44248	9.47276	6	2	2	9.16137	5.80889	9.23798
		21	2	2	2	2	2	2	2	5.54033	2	4.8871	2	2	2	2	4.76216	8.40654	8.7679	7.65031	6	7.38195	2	2	9.13988	9.43933	8.59944
		22	2	2	2	2	2	2	2	6.84696	3.4183	4.3773	2	2	5.88874	2	2.26003	8.55871	8.71767	6	8.5092	7.64024	2	2	9.22011	8.88081	8.74291

## Sheet: panel B
			Log CFU/g feces or per organ. Individual mice are shown in columns
			organ	1st Donors (E coli 536 P2cat)					Recipients (14028)					P2cat Transconjugants (14028)					2nd Recipient (SB300 p2cured)					2nd Transconjugants (SB300)
				1	2	3	4	5	1	2	3	4	5	1	2	3	4	5	1	2	3	4	5	1	2	3	4	5
			Feces	2	2	2	2	2	2	2	6.84696	3.4183	4.3773	2	2	5.88874	2	2.26003	8.55871	8.71767	2	8.5092	7.64024	2	2	9.22011	8.88081	8.74291
			Spleen	1.30103	1.30103	1.30103	1.30103	1.30103	4.38021	4.34242	4.44716	4.94448	4.91158	1.30103	1.30103	1.30103	1.30103	1.30103	1.30103	1.30103	1.30103	1.30103	1.30103	1.30103	1.30103	1.30103	1.30103	1.30103
			Liver	1.90309	1.90309	1.90309	1.90309	1.90309	3.85733	3.98227	3.85733	4.13354	4.60119	1.90309	1.90309	1.90309	1.90309	1.90309	1.90309	1.90309	1.90309	1.90309	1.90309	1.90309	1.90309	1.90309	1.90309	1.90309
			GB	1	1	1	1	1	1.77815	1	6.17609	2.17609	2.51851	1	1	1	1	1	1	3.77815	1	2.5682	1	1	1	1	1	1
			mLN	1	1	1	1	1	2.69897	1	3.39794	3.44716	3.15534	1	1	3	3.43136	2.39794	1.95424	4.09342	1.60206	1.95424	1.77815	1	1	2.51851	3.04922	1.90309

## Sheet: panel C
			Log CFU/g feces. Individual mice are shown in columns
			day p.i.,	1st Donors (E coli 536 P2cat)							Recipients (14028)							P2cat Transconjugants (14028)							2nd Donors (E coli ESBL15)							ESBL Transconjugants (14028)
				1	2	3	4	5	6	7	1	2	3	4	5	6	7	1	2	3	4	5	6	7	1	2	3	4	5	6	7	1	2	3	4	5	6	7
			0
			1								2	2	2	2	2	2	2
			2								2	2	2	2	2	2	2
			3	9.75871	9.79345	9.70197	9.80234	9.59215	9.55282	9.56774	2	2.90136	4.79146	2	2	2	2	2	2	2	2	2	2	2
			4	9.39923	9.27536	9.51415	9.46628	9.67178	9.38935	9.28035	7.89365	7.63084	2	2	8.32987	2	2	4.88993	5.88295	2	2	6.07702	2	2
			5	8.81071	9.33489	9.02228	9.47394	9.18709	9.36915	9.28579	7.92341	6.88773	6.80367	2	8.22847	2.97469	2	7.9814	8.41921	4.56634	2	3.4124	2	2
			6	8.22127	9.07826	8.49372	8.6376	7.21467	8.16368	6.93785	7.47027	8.6492	7.95825	2	6	5.04904	2	7.92024	8.05937	4.87694	2	7.21467	2	2
			7	7.68508	9.3706	6.48971	7.31161	7.8893	6.06298	6.66367	6.98611	6.88773	7.45059	2	7.09691	7.98721	2	8.75696	8.93305	4.12173	2	8.94817	4.06298	2
			8	8.78593	9.70658	7.34708	5.56663	8.08631	6.26914	6.16345	6	6.84924	7.16548	2	6.85078	6.24795	2	8.98476	9.07196	3.78545	2	9.21439	2	2
			9	9.24354	9.29267	7.44017	5.31408	9.32331	7.15582	6.09796	6	6	6.72524	2.83121	9.30558	6.43023	2	8.52497	9.15797	3.73544	2	9.00455	4.64207	2
			10	9.48926	9.54004	7.76227	5.03218	9.35703	7.23928	5.68951	6	6.88107	6.14133	3.76112	9.09611	7.24255	2	8.54136	9.17993	7.03834	2	9.31282	5.40562	2
			11	2	2	2	2	2	2	2	2	2	2	2	3.4279	2	2	2	2.64878	2	2	2	2	2
			12	2	2	2	2	2	2	2	2	2	2	2	2	2	2	2	2	2	2	2	2	2
			13	2	2	2	2	2	2	2	2	2	2	2	2	2	2	2	2	2	2	2	2	2
			14	2	2	2	2	2	2	2	2	2	2	2	2	2	2	2	2	2	2	2	2	2
			15	2	2	2	2	2	2	2	2	2	2	2	2	2	2	2	2	2	2	2	2	2
			16	2	2	2	2	2	2	2	2	2	2	2	2	2	2	2	2	2	2	2	2	2	2	7.59774	2	3.0853	4.74112	8.84697	3.34748	2	2	2	2	2	2	2
			17	2	2	2	2	2	2	2	2	2	2	2	2	6.9868	2	2	2	2	2	2	2	2	2	9.34034	5.57787	7	9.55157	9.3895	5.45387	2	2	2	2	2	4.64353	2
			18	2	2	2	2	2	2	2	2	4.0942	2	2	2	6.38535	2	2	4.81021	2	2	2	2	2	2	9.65051	9.48603	2	6.63171	9.35902	7.36653	2	2	2	2	2	7.48124	2
			19	2	2	2	2	2.59176	2	2	2	6.78442	5.80731	2	4.64866	7.15335	2	2	7.22034	2	2	4.17154	2	2	2	9.32301	9.61396	5.66912	8.38021	9.04545	9.15539	2	3.44219	3.4437	2	2	8.05644	2
			20	2	3.90201	2	2	3.59959	2	2	2	6.29984	2	9.05358	2.75449	6	2	2	6.55522	2	2	2	2	2	4.9617	9.25419	6.81248	2	9.43573	8.7697	9.12671	2	2.69789	2	2	2	8.78991	3.78693
			21	2	5.56648	2	2	2	2	2	2	7.59324	5.00882	8.31929	7.4777	6	2	2.46218	8.24094	2	2	5.5563	2	2	5.9393	9.24373	9.04442	2	9.72263	7.4034	7.72764	2	5.11507	2.70997	2	2	7.94747	2
			22	2	8.09691	2	2	6.33117	2	2	2.9881	6.60065	6.45207	9.23966	6.37346	6	2	3.11304	7.93554	2	2	5.23178	2	2	9.06405	8.97693	8.92655	2	9.20359	9.29235	8.82508	2	5.50957	3.8511	2	5.46587	7.9539	2

## Sheet: panel D
			Log CFU/g feces or per organ. Individual mice are shown in columns
		organ	1st Donors (E coli 536 P2cat)							Recipients (14028)							P2cat Transconjugants (14028)							2nd Donors (E coli ESBL15)							ESBL Transconjugants (14028)
			1	2	3	4	5	6	7	1	2	3	4	5	6	7	1	2	3	4	5	6	7	1	2	3	4	5	6	7	1	2	3	4	5	6	7
		Feces	2	8.09691	2	2	6.33117	2	2	2.9881	6.60065	6.45207	9.23966	6.37346	6	2	3.11304	7.93554	2	2	5.23178	2	2	9.06405	8.97693	8.92655	2	9.20359	9.29235	8.82508	2	5.50957	3.8511	2	5.46587	7.9539	2
		Spleen	1.30103	1.30103	1.30103	1.30103	1.30103	1.30103	1.30103	3.85491	4.78247	4.48287	4.74819	4.70893	4.44716	4.50515	2.38021	2.30103	1.30103	1.30103	1.60206	1.30103	1.30103	1.30103	1.30103	1.30103	1.30103	1.30103	1.30103	1.30103	1.30103	1.30103	1.30103	1.30103	1.30103	1.30103	1.30103
		Liver	1.90309	1.90309	1.90309	1.90309	1.90309	1.90309	1.90309	2.74819	4.09899	4.15836	4.15836	4.31806	3.60206	4.01703	2.38021	2.38021	1.90309	1.90309	1.90309	1.90309	1.90309	1.90309	1.90309	1.90309	1.90309	1.90309	1.90309	1.90309	1.90309	1.90309	1.90309	1.90309	1.90309	1.90309	1.90309
		GB	1	1	1	1	1	1	1	1	2.20412	1.8451	4.53857	2.86923	2.04139	1	1	1	1	1	1	1	1	1	4.51375	1	1	1	1	1	1	1	1	1	1	1	1
		mLN	1	1	1	1	1	1	1	2.94448	2.20412	3.36173	3.33445	3.22531	3.38382	2.74819	3.20412	3.57519	1.30103	1	1	1	1	1	1	1	1	1	1	1	1	1	1	1	1	2.8451	1
