# Supplementary material for: Pathogen invasion-dependent tissue reservoirs and plasmid-encoded antibiotic degradation boost plasmid spread in the gut
Source: eLife. 2021 Dec 7;10:e69744. doi: 10.7554/eLife.69744 (PMC8651294; doi:10.7554/eLife.69744)
Supplement: Figure 3—figure supplement 2—source data 1. [file elife-69744-fig3-figsupp2-data1.xlsx]

## Sheet: panel A
		Log CFU/g feces. Individual mice are shown in columns
			Donors (E coli 536)					Recipients (STm 14028)					Transconjugants (14028)
			1	2	3	4	5	1	2	3	4	5	1	2	3	4	5
		0
		1						2	2	2	2	2
		2						2	2	2	2	2
		3	9.60206	9.61974	9.49586	9.64506	9.69704	5.46618	2	2	2	2	2	2	2	2	2
		4	9.46055	9.37161	9.2231	9.75449	9.54169	7.02919	4.71684	2	2	4.138	8.05038	2	2	2	2
		5	8.69626	9.28532	7.20066	9.05552	8.52076	6	8.04239	2	2	4.38722	8.83457	6.15269	2	2	2
		6	9.36034	8.01233	5.93181	7.01547	8.54407	7.56331	7.21615	2	2	6.23846	8.64249	4.06155	2	2	3.22185
		7	9.07763	6.08355	6.67415	6.21388	7.69224	6	6.08355	2	2	7.03181	8.61575	6.5307	2	2	3.96524
		8	9.45837	6.48555	6.4605	6.20761	6.08052	6	5.07058	2.84771	2	6.71476	9.14874	5.07058	2	2	2
		9	9.47454	7.55658	6.48877	8.23694	6.59472	6.55129	5.767	4.08223	2	6.93955	8.41462	5.06803	2	2	4.3704
		10	9.38672	8.92996	7.12887	6.74897	8.39263	6	6.9256	3.43573	2.44794	6.68967	8.96464	5.62893	2	2	7.15551
		11	2	2	2	2	2	2	2	2	2	3.03152	2	2	2	2	2
		12	2	2	2	2	2	2	2	2	2	2	2	2	2	2	2
		13	2	2	2	2	2	2	2	2	2	2	2	2	2	2	2
		14	2	2	2	2	2	2	2	2	2	2	2	2	2	2	2
		15	2	2	2	2	2	2	2	2	2	2	2	2	2	2	2

## Sheet: panel B
		Log CFU/g feces or per organ. Individual mice are shown in columns
		organs	Donors (E coli 536)					Recipients (STm 14028)					Transconjugants (14028)
			1	2	3	4	5	1	2	3	4	5	1	2	3	4	5
		Feces	2	2	2	2	2	2	2	2	2	2	2	2	2	2	2
		Spleen	1.30103	1.30103	1.30103	1.30103	1.30103	4.04922	4.09621	3.96755	3.60206	3.39445	1.30103	1.30103	1.30103	1.30103	1.30103
		Liver	1.90309	1.90309	1.90309	1.90309	1.90309	3.82737	3.90309	3.84757	3.2833	3.18184	1.90309	1.90309	1.90309	1.90309	1.90309
		GB	1	1	1	1	1	2.30103	2.11394	1	1.60206	1	1	1	1	1	1
		mLN	1	1	1	1	1	2.68124	3.21484	2.98227	2.04139	3.12057	3.26482	1.60206	1	1	1
