# Supplementary material for: Pathogen invasion-dependent tissue reservoirs and plasmid-encoded antibiotic degradation boost plasmid spread in the gut
Source: eLife. 2021 Dec 7;10:e69744. doi: 10.7554/eLife.69744 (PMC8651294; doi:10.7554/eLife.69744)
Supplement: Figure 3—figure supplement 3—source data 1. [file elife-69744-fig3-figsupp3-data1.xlsx]

## Sheet: panel A
		Log CFU/g feces. Individual mice are shown in columns
			Donors (E coli 536)
			1	2	3	4	5
		0
		1	10.0719	10.316	10.1335	10.2553	10.1875
		2	9.81757	9.53782	9.97543	9.79657	10.2304
		3	8.90902	9.55509	9.26007	9.34044	8.90741
		4	8.26007	9.01703	8.6902	8.81023	8.16137
		5	5.95231	7.14302	6.76343	6.67486	7.17609
		6	5.29666	5.76118	6.08636	6.92221	4.87157
		7	6.33041	5.89653	4.90309	5.25527	3.64738
		8	6.20412	6.87332	4.36173	6.8451	2
		9	2	2	2	2	2
		10	2	2	2	2	2
		11	2	2	2	2	2
		12	2	2	2	2	2
		13	2	2	2	2	2
		14	2	2	2	2	2
		15	2	2	2	2	2
		16	2	2	2	2	2

## Sheet: panel B
		Log CFU/g feces or per organ. Individual mice are shown in columns
		organs	Donors (E coli 536)
			1	2	3	4	5
		Feces	2	2	2	2	2
		Spleen	1.30103	1.30103	1.30103	1.30103	1.30103
		Liver	1.90309	1.90309	1.90309	1.90309	1.90309
		GB	1	1	1	1	1
		mLN	1	1	1	1	1
