# Supplementary material for: Pathogen invasion-dependent tissue reservoirs and plasmid-encoded antibiotic degradation boost plasmid spread in the gut
Source: eLife. 2021 Dec 7;10:e69744. doi: 10.7554/eLife.69744 (PMC8651294; doi:10.7554/eLife.69744)
Supplement: Figure 3—figure supplement 4—source data 1. [file elife-69744-fig3-figsupp4-data1.xlsx]

## Sheet: Sheet1
		Log CFU/g feces or per organ. Individual mice are shown in columns
		organs	Donors (S.Tm SL1344)					Recipients (STm 14028)					Transconjugants (14028)
			1	2	3	4	5	1	2	3	4	5	1	2	3	4	5
		Feces	2	2	2	2	2	2	2	2	2	2	2	2	2	2	2
		Spleen	4.36549	4.32428	4.37658	4.25042	3.95231	1.60206	4.18469	3.73878	3.95809	3.86688	1.30103	1.30103	1.30103	1.30103	1.30103
		Liver	4.17898	4.23553	3.86213	3.58433	3.47129	1.90309	4.2014	3.45939	3.24551	3.39445	1.90309	1.90309	1.90309	1.90309	1.90309
		GB	1	1.95424	1	1.30103	1	1	2.41497	1	1	1	1	1	1	1	1
		mLN	1	2.20412	2	2.77815	2.66276	1	1	1	2.44716	1.90309	1	1	1	1	1
