# Supplementary material for: Pathogen invasion-dependent tissue reservoirs and plasmid-encoded antibiotic degradation boost plasmid spread in the gut
Source: eLife. 2021 Dec 7;10:e69744. doi: 10.7554/eLife.69744 (PMC8651294; doi:10.7554/eLife.69744)
Supplement: Figure 3—source data 1. [file elife-69744-fig3-data1.xlsx]

## Sheet: panel A
		Log CFU / g feces, transconjugants. Individual mice numbered and indicated in columns
	day p.i.	Primary transconjugants					Secondary transconjugants
		1	2	3	4	5	1	2	3	4	5
	2	2	2	2	2	2
	3	2	2	2	4.65418	2
	4	2	2	4.45179	8.35025	5.53105
	5	2	2	8.58995	8.56585	7.83676
	6	2	2	7.75205	8.13033	6.86806
	7	2	2	8.49415	8.78533	8.85602
	8	2	2	8.73078	8.58206	8.59196
	9	2	2	8.44091	7.47567	6.84619
	10	2	2	7.63246	8.52375	7.40203
	11	2	2	2	3.54778	2
	12	2	2	2	2	2
	13	2	2	2	2	2
	14	2	2	2	2	2
	15	2	2	2	2	2	2	2	2	2	2
	16	2	2	2	2	2	2	2	2	2	2
	17	2	2	2	2	2.86487	2	2	2	2	4.78915
	18	2	2	2	2	5.13842	2	2	2	2	8.49857
	19	2	2	2	2	5.59346	2	2	7.95665	2	9.09861
	20	2	2	2	2	2.73283	2	2	9.16137	5.80889	9.23798
	21	2	2	2	2	4.76216	2	2	9.13988	9.43933	8.59944
	22	2	2	5.88874	2	2.26003	2	2	9.22011	8.88081	8.74291

## Sheet: panel B
			Log CFU / g feces, or log CFU / organ. Individual mice numbered and indicated in columns
		organ	Primary transconjugants					Secondary transconjugants
			1	2	3	4	5	1	2	3	4	5
		Feces	2	2	5.88874	2	2.26003	2	2	9.22011	8.88081	8.74291
		Spleen	1.30103	1.30103	1.30103	1.30103	1.30103	1.30103	1.30103	1.30103	1.30103	1.30103
		Liver	1.90309	1.90309	1.90309	1.90309	1.90309	1.90309	1.90309	1.90309	1.90309	1.90309
		GB	1	1	1	1	1	1	1	1	1	1
		mLN	1	1	3	3.43136	2.39794	1	1	2.51851	3.04922	1.90309

## Sheet: panel C
		Log CFU / g feces, transconjugants. Individual mice numbered and indicated in columns
		day p.i.	P2cat transconjugants							pESBL transconjugants
			1	2	3	4	5	6	7	1	2	3	4	5	6	7
		2	2	2	2	2	2	2	2
		3	2	2	2	2	2	2	2
		4	4.88993	5.88295	2	2	6.07702	2	2
		5	7.9814	8.41921	4.56634	2	3.4124	2	2
		6	7.92024	8.05937	4.87694	2	7.21467	2	2
		7	8.75696	8.93305	4.12173	2	8.94817	4.06298	2
		8	8.98476	9.07196	3.78545	2	9.21439	2	2
		9	8.52497	9.15797	3.73544	2	9.00455	4.64207	2
		10	8.54136	9.17993	7.03834	2	9.31282	5.40562	2
		11	2	2.64878	2	2	2	2	2
		12	2	2	2	2	2	2	2
		13	2	2	2	2	2	2	2
		14	2	2	2	2	2	2	2
		15	2	2	2	2	2	2	2	2	2	2	2	2	2	2
		16	2	2	2	2	2	2	2	2	2	2	2	2	2	2
		17	2	2	2	2	2	2	2	2	2	2	2	2	4.64353	2
		18	2	4.81021	2	2	2	2	2	2	2	2	2	2	7.48124	2
		19	2	7.22034	2	2	4.17154	2	2	2	3.44219	3.4437	2	2	8.05644	2
		20	2	6.55522	2	2	2	2	2	2	2.69789	2	2	2	8.78991	3.78693
		21	2.46218	8.24094	2	2	5.5563	2	2	2	5.11507	2.70997	2	2	7.94747	2
		22	3.11304	7.93554	2	2	5.23178	2	2	2	5.50957	3.8511	2	5.46587	7.9539	2

## Sheet: panel D
			Log CFU / g feces, or log CFU / organ. Individual mice numbered and indicated in columns
		organ	P2cattransconjugants							pESBL transconjugants
			1	2	3	4	5	6	7	1	2	3	4	5	6	7
		Feces	3.11304	7.93554	2	2	5.23178	2	2	2	5.50957	3.8511	2	5.46587	7.9539	2
		Spleen	2.38021	2.30103	1.30103	1.30103	1.60206	1.30103	1.30103	1.30103	1.30103	1.30103	1.30103	1.30103	1.30103	1.30103
		Liver	2.38021	2.38021	1.90309	1.90309	1.90309	1.90309	1.90309	1.90309	1.90309	1.90309	1.90309	1.90309	1.90309	1.90309
		GB	1	1	1	1	1	1	1	1	1	1	1	1	1	1
		mLN	3.20412	3.57519	1.30103	1	1	1	1	1	1	1	1	1	2.8451	1
