# Supplementary material for: Pathogen invasion-dependent tissue reservoirs and plasmid-encoded antibiotic degradation boost plasmid spread in the gut
Source: eLife. 2021 Dec 7;10:e69744. doi: 10.7554/eLife.69744 (PMC8651294; doi:10.7554/eLife.69744)
Supplement: Figure 4—figure supplement 1—source data 1. [file elife-69744-fig4-figsupp1-data1.xlsx]

## Sheet: panel A
			E coli CFU/g feces. Individual mice shown in columns
		day of experiment	E. coli ΔpESBL15										E. coli pESBL15
			1	2	3	4	5	6	7	8	9	10	1	2	3	4	5	6	7	8	9	10		p value (two-tailed Mann-Whitney test)
		0
		1	100	100	100	100	100	100	100	100	100	100	100	100	100	100	100	100	100	100	100	100		>0.9999	ns
		2	100	100	4260	465000	100	100	995	100	100	32500	11800000000	14900000000	8440000	16000000000	28900000000	24200000000	18100000000	20200000000	5930000000	12500000000		<0.0001	****
		3	100	100	100	100	100	100	1360	100	100	100	16800000000	45800000000	980000000000	28500000000	10400000000	26900000000	71800000000	6130000000	5950000000	5960000000		<0.0001	****
		4	100	100	100	100	100	100	100	100	100	100	37300000000	26400000000	15400000000	52400000000	39700000000	20200000000	22500000000	5060000000	4170000000	5240000000		<0.0001	****
		5	100	100	100	100	100	100	100	100	100	100	12400000000	13000000000	13200000000	19700000000	31600000000	17500000000	13000000000	6360000000	9850000000	6350000000		<0.0001	****
		6	100	100	100	100	100	100	100	100	100	100	10300000000	11900000000	20000000000	20600000000	20800000000	13700000000	4370000000	5430000000	9680000000	6320000000		<0.0001	****
		7	100	100	100	100	100	100	100	100	100	100	14200000000	14400000000	15200000000	10700000000	14600000000	9480000000	8350000000	4250000000	6860000000	4040000000		<0.0001	****
		8	100	100	100	100	100	100	100	100	100	100	6070000000	28500000000	10300000000	22500000000	26800000000	42400000000	3630000000	3470000000	8200000000	4170000000		<0.0001	****
		9	100	100	100	100	100	100	100	100	100	100	11600000000	95300000000	10100000000	15200000000	41300000000	3180000000	1550000000	9680000000	4920000000	4010000000		<0.0001	****
		10	100	100	100	100	100	100	100	100	100	100	6340000000	33100000000	5850000000	10100000000	20000000000	5620000000	3990000000	2920000000	2270000000	2330000000		<0.0001	****

## Sheet: panel B
		S.Tm total population (CFU / g feces; CFU / organ)
		Individual mice indicated in columns
			E. coli ΔpESBL15										E. coli pESBL15
			1	2	3	4	5	6	7	8	9	10	1	2	3	4	5	6	7	8	9	10		p value (two-tailed Mann-Whitney test)
		Feces	100	100	100	100	100	100	100	100	100	100	494000000	1130000000	368000000	100	100	100	188000000	100	100	986000000		0.0325	*
		Spleen	47200	7040	4680	8640	2880	12500	25900	15400	5760	14700	240000	32000	264000	16000	236000	4000	15400	14400	25000	26200		0.0304	*
		Liver	24800	3200	3360	10900	4480	23700	39700	48600	8640	10900	432000	464000	96000	32000	160000	11800	22400	22400	75500	57600		0.0048	**
		GB	10	10	10	20	10	10	10	10	10	10	500	40	100	10	10	10	10	20	80	180		0.0186	*
		mLN	40	10	160	520	10	60	280	10	10	10	100000	5440	4840	10	9920	10	1440	800	1320	2800		0.0059	**
