# Supplementary material for: Pathogen invasion-dependent tissue reservoirs and plasmid-encoded antibiotic degradation boost plasmid spread in the gut
Source: eLife. 2021 Dec 7;10:e69744. doi: 10.7554/eLife.69744 (PMC8651294; doi:10.7554/eLife.69744)
Supplement: Figure 4—source data 1. [file elife-69744-fig4-data1.xlsx]

## Sheet: panel A
			S.Tm population (CFU / g feces)
			Individual mice indicated in columns
		day p.i.	E. coli ΔpESBL15										E. coli pESBL15
			1	2	3	4	5	6	7	8	9	10	1	2	3	4	5	6	7	8	9	10		p value (two-tailed Mann-Whitney test)
		0
		1	100	100	100	1120	1120	100	100	100	100	100	100	100	100	100	100	100	100	100	100	100		0.4737	ns
		2	100	100	100	65800	100	100	100	100	100	100	9030	100	100	100	100	100	100	100	100	100		>0.9999	ns
		3	100	100	100	100	100	100	100	100	100	100	100	100	100	100	100	100	100	100	100	100		>0.9999	ns
		4	100	100	100	100	100	100	100	100	100	100	4800	100	100	100	100	100	295000	100	100	100		0.4737	ns
		5	100	100	100	100	100	100	100	100	100	100	345000000	100	100	100	100	100	405000000	100	100	100		0.4737	ns
		6	100	100	100	100	100	100	100	100	100	100	2890000000	100	100	100	100	100	306000000	100	100	100		0.4737	ns
		7	100	100	100	100	100	100	100	100	100	100	1630000000	514	635	100	100	100	552000000	100	100	100		0.0867	ns
		8	100	100	100	100	100	100	100	100	100	100	747000000	353000000	1210000000	100	100	100	1010000000	100	100	100		0.0867	ns
		9	100	100	100	100	100	100	100	100	100	100	885000000	307000000	56300000	100	100	100	158000000	100	100	22400000		0.0325	*
		10	100	100	100	100	100	100	100	100	100	100	494000000	1130000000	368000000	100	100	100	188000000	100	100	986000000		0.0325	*

## Sheet: panel B
			Proportion transconjugants (transconjugants / recipients + transconjugants)					n/a = a proportion cannot be calculated because there were no recipients
			Individual mice indicated in columns					yellow highlight = no transconjugants were detected and therefore the values for proportion are at the detection limit.
	day p.i.	E. coli ΔpESBL15										E. coli pESBL15
		1	2	3	4	5	6	7	8	9	10	1	2	3	4	5	6	7	8	9	10		p value (two-tailed Mann-Whitney test)
	0																						For the purposes of this non-parametric test, n/a values were treated as "zero".
	1	n/a	n/a	n/a	0.089	0.0895	n/a	n/a	n/a	n/a	n/a	n/a	n/a	n/a	n/a	n/a	n/a	n/a	n/a	n/a	n/a		>0.9999	ns
	2	n/a	n/a	n/a	0.00152	n/a	n/a	n/a	n/a	n/a	n/a	0.0111	n/a	n/a	n/a	n/a	n/a	n/a	n/a	n/a	n/a		>0.9999	ns
	3	n/a	n/a	n/a	n/a	n/a	n/a	n/a	n/a	n/a	n/a	n/a	n/a	n/a	n/a	n/a	n/a	n/a	n/a	n/a	n/a		>0.9999	ns
	4	n/a	n/a	n/a	n/a	n/a	n/a	n/a	n/a	n/a	n/a	1	n/a	n/a	n/a	n/a	n/a	0.000339	n/a	n/a	n/a		>0.9999	ns
	5	n/a	n/a	n/a	n/a	n/a	n/a	n/a	n/a	n/a	n/a	1	n/a	n/a	n/a	n/a	n/a	1	n/a	n/a	n/a		0.4737	ns
	6	n/a	n/a	n/a	n/a	n/a	n/a	n/a	n/a	n/a	n/a	1	n/a	n/a	n/a	n/a	n/a	1	n/a	n/a	n/a		0.4737	ns
	7	n/a	n/a	n/a	n/a	n/a	n/a	n/a	n/a	n/a	n/a	1	1	1	n/a	n/a	n/a	1	n/a	n/a	n/a		0.0867	ns
	8	n/a	n/a	n/a	n/a	n/a	n/a	n/a	n/a	n/a	n/a	1	1	1	n/a	n/a	n/a	1	n/a	n/a	n/a		0.0867	ns
	9	n/a	n/a	n/a	n/a	n/a	n/a	n/a	n/a	n/a	n/a	1	1	1	n/a	n/a	n/a	1	n/a	n/a	1		0.0325	*
	10	n/a	n/a	n/a	n/a	n/a	n/a	n/a	n/a	n/a	n/a	1	1	1	n/a	n/a	n/a	1	n/a	n/a	1		0.0325	*

## Sheet: panel C
			LCN2 (ng / g feces) as a readout for inflammation - individual mice shown in columns
		day p.i.	E. coli ΔpESBL15										E. coli pESBL15
			1	2	3	4	5	6	7	8	9	10	1	2	3	4	5	6	7	8	9	10		p value (two-tailed Mann-Whitney test)
		0
		1	7.21437	18.7025	21.7005	7.3158	27.1844	53.2044	15.5531	33.9373	23.6062	6.55103	23.4883	18.6797	7.91965	3.31824	57.6088	19.4945	2	10.4697	11.7334	24.5168		0.5288	ns
		2	2	2	2	43.3334	2	2	2	5.595	2	2.26462	294.27	10.7328	2.7237	27.0537	11.8924	47.7944	26.0699	4.74215	2	25.7761		0.0058	**
		3	2.42594	2	2	3.57361	2	2	2	2	2	2	17.4062	4.67742	585.401	5.22484	25.6775	9.15252	13.4723	2	2.93094	12.5627		0.0003	***
		4	2	2	2	2	2	2	2	2	2	2	6.53506	7.53001	122.731	7.33249	16.7249	2	22.3141	4.20535	8.70853	11.9864		0.0001	***
		5	2	2	2	12.4069	2	2	2	2	2	2	12.2067	2	23.1258	3.62004	6.38028	7.66308	13.838	6.70378	10.8706	2		0.0043	**
		6	2	2	2	2	2	2	2	2	2	2	20.8015	3.35269	12.9759	6.06959	16.4122	8.32839	101.015	5.26033	35.1852	2.91304		<0.0001	****
		7	2	2	2	2	2	2	2	2	2	2	2072.55	5.05087	12.2031	6.19346	13.4507	10.7895	278.577	4.56119	9.84896	2.38216		<0.0001	****
		8	2	2	2	2	2	2	2	2	2	2	401.382	43.2849	50.3933	63.408	10.0036	7.67661	997.599	3.37651	8.9332	5.59619		<0.0001	****
		9	2	2	2	2	2	2	2	2	2	2	1120.78	22.3979	22.7002	56.9269	97.3387	8.33174	1212.69	12.8869	15.497	2		0.0001	***
		10	2	2	2	2	2	2	2	2	2	2	1202.62	39.2571	12.6593	25.8712	7.08757	11.9706	971.108	10.0412	55.6218	505.533		<0.0001	****

## Sheet: panel D
				Fecal ampicillin (ug/ml fecal content)
				individual mice indicated in columns
		day p.i.	E. coli ΔpESBL15										E. coli pESBL15
			1	2	3	4	5	6	7	8	9	10	1	2	3	4	5	6	7	8	9	10		p value (two-tailed Mann-Whitney test)
		0
		1	0.334385	0.462882	0.434426	0.198502	0.592179	0.569892	0.438017	0.185965	0.546392	0.341935	1.09278	0.284946	0.388278	0.363014	0.579235	0.135897	0.53	0.222689	0.527363	0.427419		0.9705	ns
		2
		3	48.7023	196.162	185.975	110.139	122.951	120.651	60.5924	128.837	335.121	99.8507	0.229935	0.297753	0.31085	0.286486	0.254197	0.307246	0.417323	0.375887	0.289617	0.263027		<0.0001	****
		4
		5
		6
		7	71.1221	110.672	99.778	110.433	35.065	39.3195	102.796	98.3996	167.817	87.1214	0.348684	0.272494	0.336508	0.252381	0.345277	0.261728	0.356902	0.247086	0.504762	0.582418		<0.0001	****
		8
		9
		10	46.9481	54.6191	112.101	63.7176	22.8956	42.3292	9.35676	27.1569	56.1812	1.09278	0.218107	0.187611	0.295265	0.099906	0.105894	0.065311	0.160363	0.37193	0.220833	0.151862		<0.0001	****

## Sheet: panel E
				S.Tm transconjugants (CFU / g feces; CFU / organ)
				Individual mice indicated in columns
		organ	Transconjugants (E. coli ΔpESBL15)										Transconjugants (E. coli pESBL15)
			1	2	3	4	5	6	7	8	9	10	1	2	3	4	5	6	7	8	9	10		p value (two-tailed Mann-Whitney test)
		Feces	100	100	100	100	100	100	100	100	100	100	493827158	1132743373	367688020	100	100	100	187594556	100	100	985673362		0.0325	*
		Spleen	20	20	20	20	20	20	20	20	20	20	80	20	20	20	20	20	280	20	20	20		0.4737	ns
		Liver	80	80	80	80	80	80	80	80	80	80	1120	80	80	80	80	80	320	80	80	80		0.4737	ns
		GB	10	10	10	10	10	10	10	10	10	10	10	10	10	10	10	10	10	10	10	10		>0.9999	ns
		mLN	10	10	10	10	10	10	10	10	10	10	76000	240	240	10	10	10	1440	10	10	200		0.0325	*
